# Supplementary material
Source: publisher figshare collection journal article supplement (https://asha.figshare.com/articles/dataset/_/25215203)
Supplement: Supplementary file 1 [file 1]

**Supplemental Material S3.** Correlations between MLUw based on 50 or 75 utterances at Time 1 (1) and test-based measures at Time 2 (2).

|                        | <b>gram 2</b>    | <b>voc 2</b> |
|------------------------|------------------|--------------|
| MLUw 1 (50 utterances) | 0.46 (0.56/0.42) | 0.44/0.11    |
| <i>N</i> = 100 (50/50) |                  |              |
| MLUw 1 (75 utterances) | 0.47 (0.56/0.52) | 0.52/0.07    |
| <i>N</i> = 70 (31/39)  |                  |              |

Note: gram = grammar test, voc = vocabulary test. The two numbers separated by a slash refer to two subgroups: the first to the children tested for the second time at 3;7 years, and the second to children tested at 4;3 years. The critical value of the correlation coefficient  $r$  for  $\alpha = 0.05$  is 0.20 for 100 children and 0.28 for 49/50 children when MLU was based on 50 utterances, and 0.24 for 69/70 children, 0.36 for 31 children and 0.32 for 38/39 children when MLU was based on 75 utterances.
