# Supplementary material
Source: publisher figshare collection journal article supplement (https://asha.figshare.com/articles/dataset/_/25215203)
Supplement: Supplementary file 2 [file 1]

**Supplemental Material S1.** Correlations between MLU measured in words, morphemes and syllables based on different number of utterances (all, 50, 75 or 100) in transcripts with the minimum of 100 utterances.

| MLU in        | Time 1    |               |               | Time 2    |               |               |
|---------------|-----------|---------------|---------------|-----------|---------------|---------------|
|               | all words | all syllables | all morphemes | all words | all syllables | all morphemes |
| all words     | 1.00      | 0.97          | 0.97          | 1.00      | 0.97          | 0.96          |
| all syllables | 0.97      | 1.00          | 0.97          | 0.97      | 1.00          | 0.95          |
| all morphemes | 0.97      | 0.97          | 1.00          | 0.96      | 0.95          | 1.00          |
| 50 words      | 0.90      | 0.83          | 0.87          | 0.81      | 0.80          | 0.78          |
| 50 syllables  | 0.92      | 0.91          | 0.92          | 0.79      | 0.81          | 0.77          |
| 50 morphemes  | 0.87      | 0.84          | 0.89          | 0.79      | 0.79          | 0.83          |
| 75 words      | 0.93      | 0.88          | 0.92          | 0.74      | 0.74          | 0.69          |
| 75 syllables  | 0.94      | 0.94          | 0.94          | 0.73      | 0.76          | 0.71          |
| 75 morphemes  | 0.89      | 0.86          | 0.92          | 0.86      | 0.88          | 0.92          |
| 100 words     | 0.98      | 0.94          | 0.96          | 0.97      | 0.96          | 0.95          |
| 100 syllables | 0.96      | 0.98          | 0.97          | 0.92      | 0.96          | 0.90          |
| 100 morphemes | 0.95      | 0.93          | 0.97          | 0.92      | 0.92          | 0.95          |
