# Supplementary material
Source: publisher figshare collection journal article supplement (https://asha.figshare.com/articles/dataset/_/25215203)
Supplement: Supplementary file 3 [file 1]

**Supplemental Material S6.** Regression model showing effects of MLU in words based on 50 utterances and the grammar and vocabulary test at Time 1 (1) on the MLU in words, grammar and vocabulary test at Time 2 (2).

| <i>Predictors</i>                        | <b>gram_2</b>    |              | <b>voc_2a</b>    |                  | <b>voc_2b</b>    |              | <b>MLUw_2</b>    |                  |
|------------------------------------------|------------------|--------------|------------------|------------------|------------------|--------------|------------------|------------------|
|                                          | <i>std. Beta</i> | <i>p</i>     | <i>std. Beta</i> | <i>p</i>         | <i>std. Beta</i> | <i>p</i>     | <i>std. Beta</i> | <i>p</i>         |
| (Intercept)                              | -0.00            | 0.220        | 0.00             | <b>&lt;0.001</b> | -0.00            | 0.058        | -0.00            | <b>&lt;0.001</b> |
| MLUw 1                                   | 0.30             | <b>0.002</b> | 0.28             | <b>0.037</b>     | -0.06            | 0.693        | 0.22             | <b>0.035</b>     |
| voc_1                                    | 0.15             | 0.142        | 0.27             | 0.061            | 0.42             | <b>0.009</b> | 0.06             | 0.589            |
| gram_1                                   | 0.31             | <b>0.003</b> | 0.21             | 0.156            | 0.29             | 0.107        | 0.22             | 0.059            |
| Observations                             | 95               |              | 48               |                  | 47               |              | 95               |                  |
| R <sup>2</sup> / R <sup>2</sup> adjusted | 0.350 / 0.329    |              | 0.344 / 0.299    |                  | 0.397 / 0.355    |              | 0.163 / 0.135    |                  |

Note: gram = grammar test, voc = vocabulary test, 2a = children at 3;7 years of age, voc 2b = children at 4;3 years of age.
