# Supplementary material
Source: publisher figshare collection journal article supplement (https://asha.figshare.com/articles/dataset/_/25215203)
Supplement: Supplementary file 4 [file 1]

**Supplemental Material S7.** Regression model showing effects of MLU in words based on 75 utterances and the grammar and vocabulary test at Time 1 (1) on the MLU in words, grammar and vocabulary test at Time 2 (2).

| <i>Predictors</i>                        | <b>gram_2</b>    |              | <b>voc_2</b>     |              | <b>voc_2</b>     |              | <b>MLUw_2</b>    |                  |
|------------------------------------------|------------------|--------------|------------------|--------------|------------------|--------------|------------------|------------------|
|                                          | <i>std. Beta</i> | <i>p</i>         |
| (Intercept)                              | 0.00             | 0.900        | -0.00            | <b>0.001</b> | -0.00            | <b>0.008</b> | -0.00            | <b>&lt;0.001</b> |
| MLUw_1                                   | 0.31             | <b>0.007</b> | 0.38             | <b>0.024</b> | -0.16            | 0.354        | 0.33             | <b>0.010</b>     |
| voc_1                                    | 0.24             | <b>0.045</b> | 0.18             | 0.275        | 0.37             | <b>0.048</b> | 0.02             | 0.848            |
| gram_1                                   | 0.23             | 0.056        | 0.32             | 0.064        | 0.30             | 0.159        | 0.23             | 0.082            |
| Observations                             | 67               |              | 30               |              | 37               |              | 67               |                  |
| R <sup>2</sup> / R <sup>2</sup> adjusted | 0.370 / 0.340    |              | 0.497 / 0.439    |              | 0.316 / 0.254    |              | 0.234 / 0.198    |                  |

Note: gram = grammar test, voc = vocabulary test, 2a = children at 3;7 years of age, voc 2b = children at 4;3 years of age.
