# Supplementary material
Source: publisher figshare collection journal article supplement (https://asha.figshare.com/articles/dataset/_/25215203)
Supplement: Supplementary file 5 [file 1]

**Supplemental Material S2.** Correlations between transcript-based and test-based measures (MLUw based on 50 or 75 utterances).

| Time 1        |                |               | Time 2                 |                       |
|---------------|----------------|---------------|------------------------|-----------------------|
| MLUw based on | 50 utter.      | 75 utter.     | 50 utter.              | 75 utter.             |
|               | <i>N</i> = 100 | <i>N</i> = 70 | <i>N</i> = 100 (50/50) | <i>N</i> = 70 (31/39) |
| IPSyn         | 0.84           | 0.84          | 0.67 (0.72/0.68)       | 0.63 (0.58/0.72)      |
| NDW           | 0.73           | 0.71          | 0.59 (0.64/58)         | 0.53 (0.47/0.64)      |
| gram          | 0.39           | 0.43          | 0.37 (0.30/0.41)       | 0.32 (0.21/0.42)      |
| voc           | 0.30           | 0.37          | 0.32/0.27              | 0.35/0.24             |

Note: gram = grammar test, voc = vocabulary test. The two numbers separated by a slash refer to two subgroups: the first to the children tested at 3;7 years, and the second to the children tested at 4;3 years. The critical value of the correlation coefficient  $r$  for  $\alpha = 0.05$  is 0.20 for 97/100 children and 0.28 for 49/50 children when MLU was based on 50 utterances, and 0.24 for 68/69/70 children, 0.36 for 31 children and 0.32 for 38/39 children when MLU was based on 75 utterances.
