# Supplementary material
Source: publisher figshare collection journal article supplement (https://asha.figshare.com/articles/dataset/_/25215203)
Supplement: Supplementary file 6 [file 1]

**Supplemental Material S4.** Regression model showing effects of MLU in syllables based on all utterances and the grammar and vocabulary test at Time 1 (1) on the MLU in syllables, grammar and vocabulary test at Time 2 (2).

|                                          | gram 2           |                  | voc 2a           |                  | voc 2b           |              | MLUs 2           |                  |
|------------------------------------------|------------------|------------------|------------------|------------------|------------------|--------------|------------------|------------------|
| <i>Predictors</i>                        | <i>std. Beta</i> | <i>p</i>         | <i>std. Beta</i> | <i>p</i>         | <i>std. Beta</i> | <i>p</i>     | <i>std. Beta</i> | <i>p</i>         |
| (Intercept)                              | -0.00            | 0.316            | 0.00             | <b>&lt;0.001</b> | -0.00            | <b>0.040</b> | -0.00            | <b>&lt;0.001</b> |
| MLUs 1                                   | 0.31             | <b>&lt;0.001</b> | 0.26             | <b>0.038</b>     | -0.08            | 0.589        | 0.25             | <b>0.015</b>     |
| voc 1                                    | 0.16             | 0.097            | 0.15             | 0.253            | 0.43             | <b>0.009</b> | 0.10             | 0.362            |
| gram 1                                   | 0.32             | <b>&lt;0.001</b> | 0.40             | <b>0.002</b>     | 0.30             | 0.094        | 0.25             | <b>0.018</b>     |
| Observations                             | 103              |                  | 56               |                  | 47               |              | 104              |                  |
| R <sup>2</sup> / R <sup>2</sup> adjusted | 0.376 / 0.357    |                  | 0.383 / 0.347    |                  | 0.399 / 0.357    |              | 0.223 / 0.200    |                  |

Note: gram = grammar test, voc = vocabulary test, 2a = children at 3;7 years of age, voc 2b = children at 4;3 years of age.
