# Supplementary material
Source: publisher figshare collection journal article supplement (https://asha.figshare.com/articles/dataset/_/25215203)
Supplement: Supplementary file 7 [file 1]

**Supplemental Material S5.** Regression model showing effects of MLU in morphemes based on all utterances and the grammar and vocabulary test at Time 1 (1) on the MLU in morphemes, grammar and vocabulary test at Time 2 (2).

|                                          | gram 2           |                  | voc 2a           |                  | voc 2b           |              | MLUm 2           |                  |
|------------------------------------------|------------------|------------------|------------------|------------------|------------------|--------------|------------------|------------------|
| <i>Predictors</i>                        | <i>std. Beta</i> | <i>p</i>         | <i>std. Beta</i> | <i>p</i>         | <i>std. Beta</i> | <i>p</i>     | <i>std. Beta</i> | <i>p</i>         |
| (Intercept)                              | -0.00            | 0.361            | 0.00             | <b>&lt;0.001</b> | -0.00            | <b>0.047</b> | 0.00             | <b>&lt;0.001</b> |
| MLUm 1                                   | 0.34             | <b>&lt;0.001</b> | 0.22             | 0.071            | -0.07            | 0.660        | 0.25             | <b>0.011</b>     |
| voc 1                                    | 0.16             | 0.082            | 0.16             | 0.210            | 0.42             | <b>0.009</b> | 0.09             | 0.393            |
| gram 1                                   | 0.30             | <b>0.002</b>     | 0.40             | <b>0.002</b>     | 0.30             | 0.110        | 0.26             | <b>0.014</b>     |
| Observations                             | 103              |                  | 56               |                  | 47               |              | 104              |                  |
| R <sup>2</sup> / R <sup>2</sup> adjusted | 0.393 / 0.374    |                  | 0.370 / 0.334    |                  | 0.398 / 0.356    |              | 0.238 / 0.215    |                  |

Note: gram = grammar test, voc = vocabulary test, 2a = children at 3;7 years of age, voc 2b = children at 4;3 years of age.
